# Supplementary material
Source: MDPI journal article supplement (https://www.mdpi.com/1420-3049/27/3/984)
Supplement: s1 [file s1]

Archive with 1 entries (1 files):
- molecules-1522452-supplementary.pdf
